# Supplementary material for: Openness Toward Organizational Change Scale (OTOCS): Validity evidence from Brazil and Portugal
Source: PLoS One. 2021 Apr 19;16(4):e0249986. doi: 10.1371/journal.pone.0249986 (PMC8055016; doi:10.1371/journal.pone.0249986)
Supplement: S2 Dataset — (CSV) [file pone.0249986.s002.csv]

fileName	variableName	description	unitText
S1_Dataset.csv	Sex	Worker sex	NA
S1_Dataset.csv	Country	Worker country	NA
S1_Dataset.csv	Academic_level	"High school, vocational education or less" or "Unfinished graduation Graduation" or "Post-graduation (not master neither PhD)" or "Master" or "PhD"	NA
S1_Dataset.csv	Occupational_group	ISCO - 08 occupational groups (ISCO - 08 occupational groups, see: International Labour Office. International Standard Classification of Occupations. Isco-08. Geneva, Switzerland: International Labour Organization; 2012. doi:10.13140/RG.2.1.1419.3126): "Plant and Machine Operators and Assemblers" or "Craft and Related Trades Workers" or "Skilled Agricultural, Forestry and Fishery Workers" or "Ser…	NA
S1_Dataset.csv	Working_years_job_sector	Number of working years in the job sector	Years
S1_Dataset.csv	Working_years_current_organization	Number of years in the current organization	Years
S1_Dataset.csv	Working_years_current_job	Number of working years in the current job	Years
S1_Dataset.csv	Age	Worker age	Years
S1_Dataset.csv	OTOCS1	1 - "To a Very Little Extent" to 5 - "To a Very Great Extent"	Ordered response scale
S1_Dataset.csv	OTOCS2	1 - "To a Very Little Extent" to 5 - "To a Very Great Extent"	Ordered response scale
S1_Dataset.csv	OTOCS3	1 - "To a Very Little Extent" to 5 - "To a Very Great Extent"	Ordered response scale
S1_Dataset.csv	OTOCS4	1 - "To a Very Little Extent" to 5 - "To a Very Great Extent"	Ordered response scale
S1_Dataset.csv	OTOCS5	1 - "To a Very Little Extent" to 5 - "To a Very Great Extent"	Ordered response scale
S1_Dataset.csv	SIJS1	1 - “Strongly Disagree”, 2 - “Disagree”, 3 – “Undecided”, 4 – “Agree”, 5 - “Strongly Agree”	Likert scale
S1_Dataset.csv	SIJS2	1 - “Strongly Disagree”, 2 - “Disagree”, 3 – “Undecided”, 4 – “Agree”, 5 - “Strongly Agree”	Likert scale
S1_Dataset.csv	SIJS3	1 - “Strongly Disagree”, 2 - “Disagree”, 3 – “Undecided”, 4 – “Agree”, 5 - “Strongly Agree” (already reversed)	Likert scale
S1_Dataset.csv	SIJS4	1 - “Strongly Disagree”, 2 - “Disagree”, 3 – “Undecided”, 4 – “Agree”, 5 - “Strongly Agree”	Likert scale
S1_Dataset.csv	SIJS5	1 - “Strongly Disagree”, 2 - “Disagree”, 3 – “Undecided”, 4 – “Agree”, 5 - “Strongly Agree” (already reversed)	Likert scale
S1_Dataset.csv	QWLS1	1 - "Very Untrue" to 7 - "Very True"	Ordered response scale
S1_Dataset.csv	QWLS2	1 - "Very Untrue" to 7 - "Very True"	Ordered response scale
S1_Dataset.csv	QWLS3	1 - "Very Untrue" to 7 - "Very True"	Ordered response scale
S1_Dataset.csv	QWLS4	1 - "Very Untrue" to 7 - "Very True"	Ordered response scale
S1_Dataset.csv	QWLS5	1 - "Very Untrue" to 7 - "Very True"	Ordered response scale
S1_Dataset.csv	QWLS6	1 - "Very Untrue" to 7 - "Very True"	Ordered response scale
S1_Dataset.csv	QWLS7	1 - "Very Untrue" to 7 - "Very True"	Ordered response scale
S1_Dataset.csv	QWLS8	1 - "Very Untrue" to 7 - "Very True"	Ordered response scale
S1_Dataset.csv	QWLS9	1 - "Very Untrue" to 7 - "Very True"	Ordered response scale
S1_Dataset.csv	QWLS10	1 - "Very Untrue" to 7 - "Very True"	Ordered response scale
S1_Dataset.csv	QWLS11	1 - "Very Untrue" to 7 - "Very True"	Ordered response scale
S1_Dataset.csv	QWLS12	1 - "Very Untrue" to 7 - "Very True"	Ordered response scale
S1_Dataset.csv	QWLS13	1 - "Very Untrue" to 7 - "Very True"	Ordered response scale
S1_Dataset.csv	QWLS14	1 - "Very Untrue" to 7 - "Very True"	Ordered response scale
S1_Dataset.csv	QWLS15	1 - "Very Untrue" to 7 - "Very True"	Ordered response scale
S1_Dataset.csv	QWLS16	1 - "Very Untrue" to 7 - "Very True"	Ordered response scale
S1_Dataset.csv	OLBI1	1 - “Strongly Disagree”, 2 - “Disagree”, 3 – “Neutral”, 4 – “Agree”, 5 - “Strongly Agree” (already reversed)	Likert scale
S1_Dataset.csv	OLBI2	1 - “Strongly Disagree”, 2 - “Disagree”, 3 – “Neutral”, 4 – “Agree”, 5 - “Strongly Agree”	Likert scale
S1_Dataset.csv	OLBI3	1 - “Strongly Disagree”, 2 - “Disagree”, 3 – “Neutral”, 4 – “Agree”, 5 - “Strongly Agree”	Likert scale
S1_Dataset.csv	OLBI4	1 - “Strongly Disagree”, 2 - “Disagree”, 3 – “Neutral”, 4 – “Agree”, 5 - “Strongly Agree”	Likert scale
S1_Dataset.csv	OLBI5	1 - “Strongly Disagree”, 2 - “Disagree”, 3 – “Neutral”, 4 – “Agree”, 5 - “Strongly Agree” (already reversed)	Likert scale
S1_Dataset.csv	OLBI6	1 - “Strongly Disagree”, 2 - “Disagree”, 3 – “Neutral”, 4 – “Agree”, 5 - “Strongly Agree”	Likert scale
S1_Dataset.csv	OLBI7	1 - “Strongly Disagree”, 2 - “Disagree”, 3 – “Neutral”, 4 – “Agree”, 5 - “Strongly Agree” (already reversed)	Likert scale
S1_Dataset.csv	OLBI8	1 - “Strongly Disagree”, 2 - “Disagree”, 3 – “Neutral”, 4 – “Agree”, 5 - “Strongly Agree”	Likert scale
S1_Dataset.csv	OLBI9	1 - “Strongly Disagree”, 2 - “Disagree”, 3 – “Neutral”, 4 – “Agree”, 5 - “Strongly Agree”	Likert scale
S1_Dataset.csv	OLBI10	1 - “Strongly Disagree”, 2 - “Disagree”, 3 – “Neutral”, 4 – “Agree”, 5 - “Strongly Agree” (already reversed)	Likert scale
S1_Dataset.csv	OLBI11	1 - “Strongly Disagree”, 2 - “Disagree”, 3 – “Neutral”, 4 – “Agree”, 5 - “Strongly Agree”	Likert scale
S1_Dataset.csv	OLBI12	1 - “Strongly Disagree”, 2 - “Disagree”, 3 – “Neutral”, 4 – “Agree”, 5 - “Strongly Agree”	Likert scale
S1_Dataset.csv	OLBI14	1 - “Strongly Disagree”, 2 - “Disagree”, 3 – “Neutral”, 4 – “Agree”, 5 - “Strongly Agree” (already reversed)	Likert scale
S1_Dataset.csv	OLBI15	1 - “Strongly Disagree”, 2 - “Disagree”, 3 – “Neutral”, 4 – “Agree”, 5 - “Strongly Agree” (already reversed)	Likert scale
S1_Dataset.csv	OLBI16	1 - “Strongly Disagree”, 2 - “Disagree”, 3 – “Neutral”, 4 – “Agree”, 5 - “Strongly Agree” (already reversed)	Likert scale
S1_Dataset.csv	UWES1	0 – “Never”, 1 - “Almost Never/A few times a year or less”, 2 - “Rarely/Once a month or less”, 3 – “Sometimes/A few times a month”, 4 – “Often/Once a week”, 5 - “Very often/A few times a week”, 6 - “Always/Every day”	Ordered response scale
S1_Dataset.csv	UWES2	0 – “Never”, 1 - “Almost Never/A few times a year or less”, 2 - “Rarely/Once a month or less”, 3 – “Sometimes/A few times a month”, 4 – “Often/Once a week”, 5 - “Very often/A few times a week”, 6 - “Always/Every day”	Ordered response scale
S1_Dataset.csv	UWES3	0 – “Never”, 1 - “Almost Never/A few times a year or less”, 2 - “Rarely/Once a month or less”, 3 – “Sometimes/A few times a month”, 4 – “Often/Once a week”, 5 - “Very often/A few times a week”, 6 - “Always/Every day”	Ordered response scale
S1_Dataset.csv	UWES4	0 – “Never”, 1 - “Almost Never/A few times a year or less”, 2 - “Rarely/Once a month or less”, 3 – “Sometimes/A few times a month”, 4 – “Often/Once a week”, 5 - “Very often/A few times a week”, 6 - “Always/Every day”	Ordered response scale
S1_Dataset.csv	UWES5	0 – “Never”, 1 - “Almost Never/A few times a year or less”, 2 - “Rarely/Once a month or less”, 3 – “Sometimes/A few times a month”, 4 – “Often/Once a week”, 5 - “Very often/A few times a week”, 6 - “Always/Every day”	Ordered response scale
S1_Dataset.csv	UWES6	0 – “Never”, 1 - “Almost Never/A few times a year or less”, 2 - “Rarely/Once a month or less”, 3 – “Sometimes/A few times a month”, 4 – “Often/Once a week”, 5 - “Very often/A few times a week”, 6 - “Always/Every day”	Ordered response scale
S1_Dataset.csv	UWES7	0 – “Never”, 1 - “Almost Never/A few times a year or less”, 2 - “Rarely/Once a month or less”, 3 – “Sometimes/A few times a month”, 4 – “Often/Once a week”, 5 - “Very often/A few times a week”, 6 - “Always/Every day”	Ordered response scale
S1_Dataset.csv	UWES8	0 – “Never”, 1 - “Almost Never/A few times a year or less”, 2 - “Rarely/Once a month or less”, 3 – “Sometimes/A few times a month”, 4 – “Often/Once a week”, 5 - “Very often/A few times a week”, 6 - “Always/Every day”	Ordered response scale
S1_Dataset.csv	UWES9	0 – “Never”, 1 - “Almost Never/A few times a year or less”, 2 - “Rarely/Once a month or less”, 3 – “Sometimes/A few times a month”, 4 – “Often/Once a week”, 5 - “Very often/A few times a week”, 6 - “Always/Every day”	Ordered response scale
